# Supplementary material for: Opening the conformation is a master switch for the dual localization and phosphatase activity of PTEN
Source: PubMed Central journal article supplement (PMC4517176; doi:10.1038/srep12600), 2015-07-28
Supplement: srep12600-s1.pdf [file srep12600-s1.pdf]

**Supplementary Information for**

**Opening the conformation is a master switch for the dual localization and phosphatase activity of PTEN**

Hoai-Nghia Nguyen, Jr-Ming Yang, Takafumi Miyamoto, Kie Itoh, Elmer Rho, Qiang Zhang, Takanari Inoue, Peter N. Devreotes, Hiromi Sesaki, and Miho Iijima\*

Department of Cell Biology, The Johns Hopkins University School of Medicine, Baltimore, MD

\*Correspondence: [mijima@jhmi.edu](mailto:mijima@jhmi.edu)

Figures S1-4

Tables S1 and S2

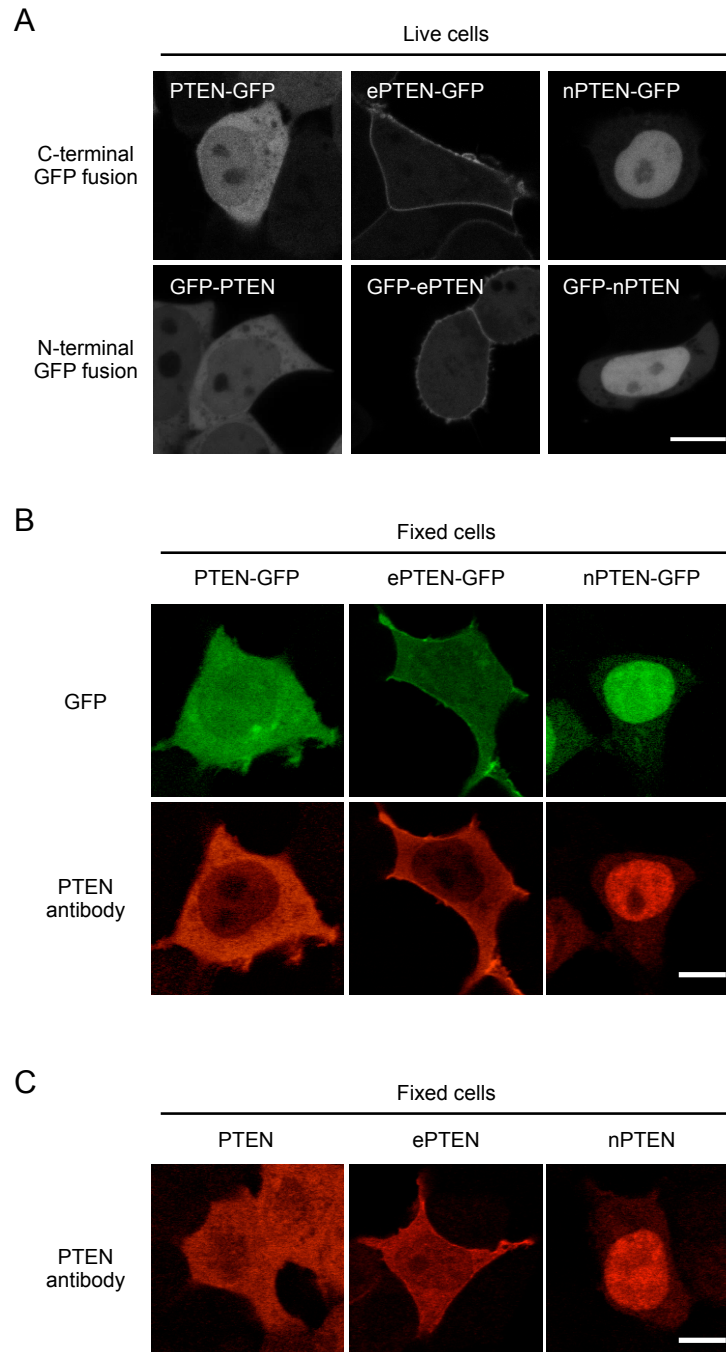

**Figure S1. GFP does not affect PTEN localization.** (A) Fluorescent microscopy images of HEK293 cells expressing the indicated PTEN-GFP (C-terminal GFP fusion) variants and GFP-PTEN (N-terminal GFP fusion) variants. Bar, 10  $\mu$ m. (B) HEK293 cells expressing the indicated PTEN-GFP were fixed and processed using an anti-PTEN antibody. (C) HEK293 cells expressing the indicated non-tagged PTEN variants labeled with an anti-PTEN antibody.

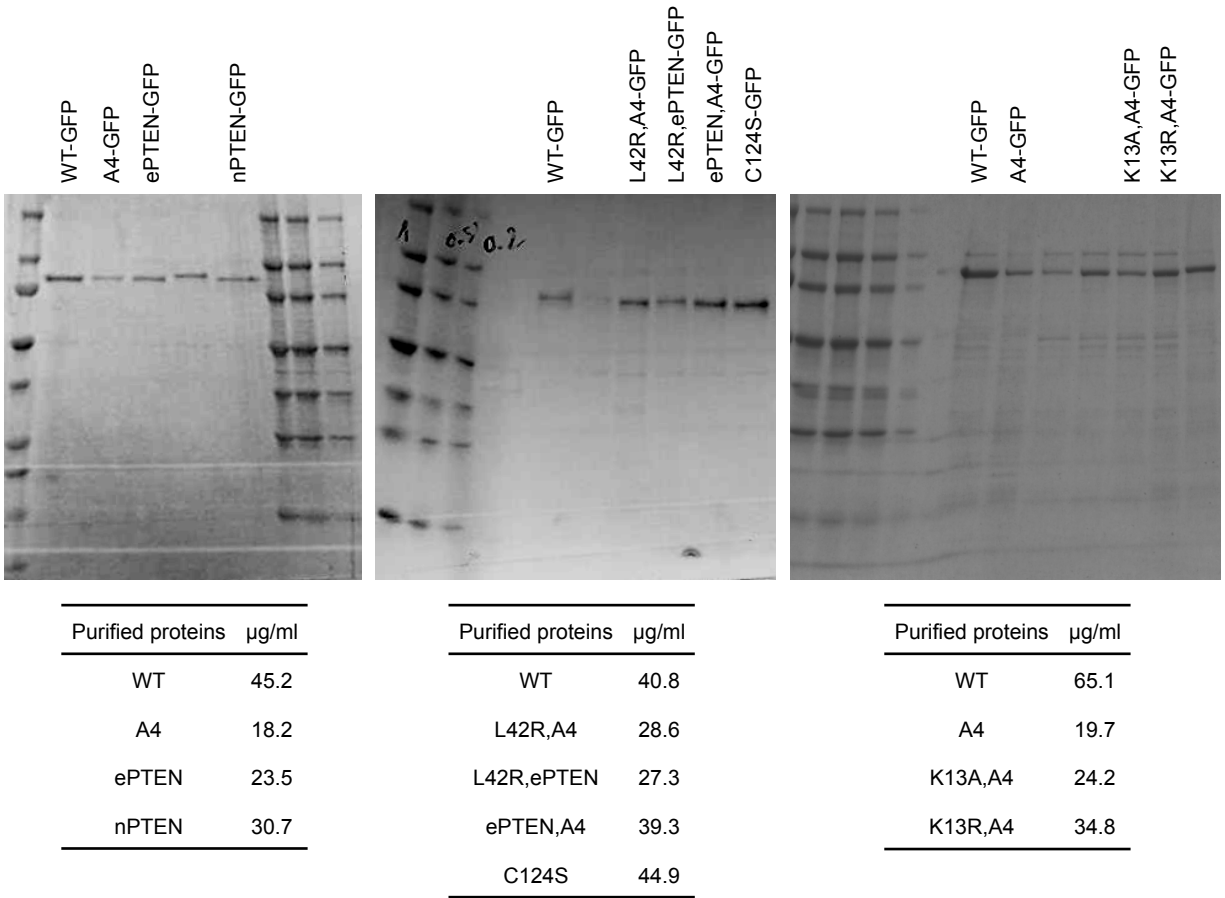

**Figure S2. Immunopurification of PTEN-GFP variants.** Purified proteins were analyzed by SDS-PAGE and Coomassie Brilliant Blue staining. Protein standards (Perfect protein marker, Millipore) were used to determine the concentrations of purified proteins.

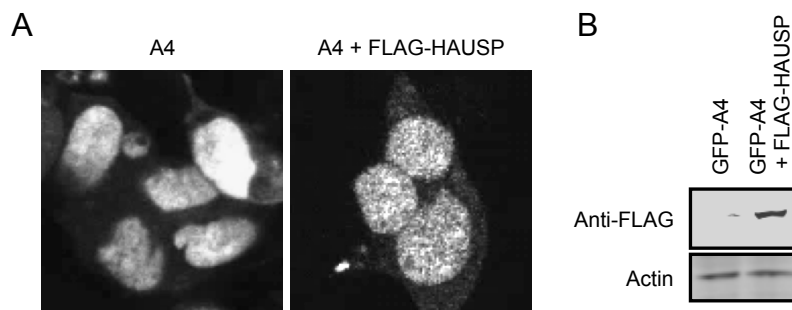

**Figure S3. Effects of USP7/ HAUSP overexpression on PTEN localization. (A)**

USP7/HAUSP was overexpressed in HEK293 cells carrying PTEN<sub>A4</sub>. (B) Immunoblotting of whole cell lysates from HEK293 cells expressing USP7/ HAUSP. Actin was used as a loading control.

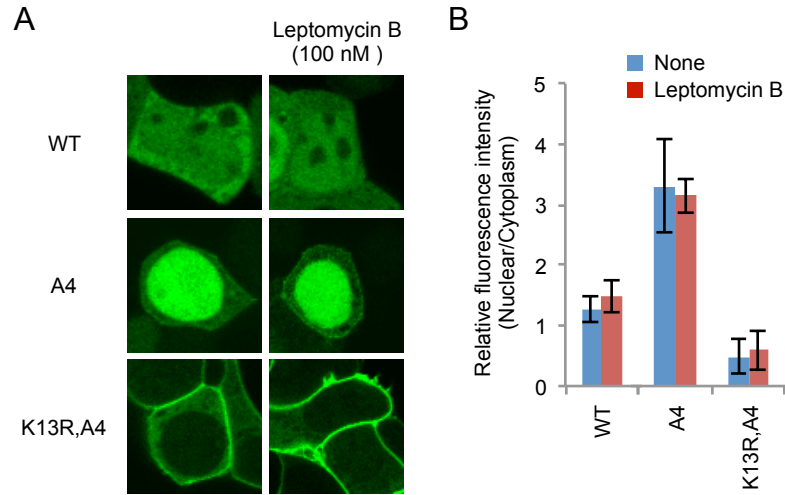

**Figure S4. Effects of the nuclear export inhibitor leptomycin B on PTEN localization.** After a 6-hour treatment with 100 nM leptomycin B, HEK293 cells expressing the indicated PTEN-GFP (C-terminal GFP fusion) variants and GFP-PTEN (N-terminal GFP fusion) variants were observed by fluorescence microscopy. Bar, 10  $\mu$ m. (B) The intensity of GFP in the nucleus was quantified relative to that in the cytosol. Values represent the means  $\pm$  SDs (n = 8).

**Table S1. Plasmids used in this study**

| Plasmids                    | Description                                                                                                                     | References                  |
|-----------------------------|---------------------------------------------------------------------------------------------------------------------------------|-----------------------------|
| pKF3                        |                                                                                                                                 | Kindly provided by Swaney K |
| pKF3-hPTEN                  |                                                                                                                                 | Nguyen <i>et al.</i> (2013) |
| pKF3-A4                     |                                                                                                                                 | Nguyen <i>et al.</i> (2013) |
| pKF3-ePTEN                  |                                                                                                                                 | Nguyen <i>et al.</i> (2014) |
| pKF3-ePTEN,A4               |                                                                                                                                 | Nguyen <i>et al.</i> (2014) |
| pKF3-nPTEN                  |                                                                                                                                 | Nguyen <i>et al.</i> (2014) |
| pKF3-nPTEN,A4               | nPTEN amplified using primers HuPTEN5BamHI2 and HuPTEN3XhoI2 and inserted into <i>BglIII/NheI</i> pKF3-A4                       | This study                  |
| pKF3-L42R                   |                                                                                                                                 | Nguyen <i>et al.</i> (2014) |
| pKF3-L42R,A4                |                                                                                                                                 | Nguyen <i>et al.</i> (2014) |
| pKF3-L42R,ePTEN             | ePTEN mutated using primers HuPTEN5BamHI2, HuPTEN3XhoI2, ePTEN-L42R-f and ePTEN-L42R-r inserted into <i>BglIII/XhoI</i> pKF3    | This study                  |
| pKF3- L42R,ePTEN,A4         | ePTEN,A4 mutated using primers HuPTEN5BamHI2, HuPTEN3XhoI2, ePTEN-L42R-f and ePTEN-L42R-r inserted into <i>BglIII/XhoI</i> pKF3 | This study                  |
| pKF3-Q17E                   |                                                                                                                                 | Nguyen <i>et al.</i> (2014) |
| pKF3-C124S                  |                                                                                                                                 | Nguyen <i>et al.</i> (2013) |
| pKF3-C124S,A4               |                                                                                                                                 | Nguyen <i>et al.</i> (2013) |
| pKF3-K13A,A4                |                                                                                                                                 | Nguyen <i>et al.</i> (2014) |
| pKF3-K13R,A4                | A4 mutated using primers HuPTEN5BamHI2, HuPTEN3XhoI2 and PTEN-K13R-f inserted into <i>BglIII/XhoI</i> pKF3                      | This study                  |
| pKF3-K13R,ePTEN             | ePTEN mutated using primers HuPTEN5BamHI2, HuPTEN3XhoI2 and PTEN-K13R-f inserted into <i>BglIII/XhoI</i> pKF3                   | This study                  |
| pKF3-K289E                  | hPTEN mutated using primers HuPTEN5BamHI2, HuPTEN3XhoI2, PTEN-K289E-f and PTEN-K289E-r inserted into <i>BglIII/XhoI</i> pKF3    | This study                  |
| pKF3-K289E,A4               | K289E amplified using primers HuPTEN5BamHI2 and HuPTEN3XhoI2 and inserted into <i>BglIII/NheI</i> pKF3-A4                       | This study                  |
| pKF3-K289E,ePTEN            | ePTEN mutated using primers HuPTEN5BamHI2, HuPTEN3XhoI2, PTEN-K289E-f and PTEN-K289E-r inserted into <i>BglIII/XhoI</i> pKF3    | This study                  |
| pKF3-ePTEN, $\Delta$ PDZ-BM | ePTEN mutated using primers HuPTEN5BamHI2, HuPTEN3XhoI2 and PTEN- $\Delta$ PDZ-XhoI-r inserted into <i>BglIII/XhoI</i> pKF3     | This study                  |
| pcDNA3.1-PTEN               |                                                                                                                                 | Nguyen <i>et al.</i> (2013) |
| pcDNA3.1-A4                 |                                                                                                                                 | Nguyen <i>et al.</i> (2013) |
| pcDNA3.1-ePTEN              |                                                                                                                                 | Nguyen <i>et al.</i> (2014) |
| pcDNA3.1-ePTEN,A4           |                                                                                                                                 | Nguyen <i>et al.</i> (2014) |
| pcDNA3.1-nPTEN              |                                                                                                                                 | Nguyen <i>et al.</i> (2014) |
| pcDNA3.1-nPTEN,A4           | nPTEN,A4-GFP amplified using primers PTEN-TOPO-f and GFP-TOPO-r inserted into pcDNA3.1                                          | This study                  |
| pcDNA3.1-L42R               |                                                                                                                                 | Nguyen <i>et al.</i> (2014) |
| pcDNA3.1-L42R,A4            |                                                                                                                                 | Nguyen <i>et al.</i> (2014) |
| pcDNA3.1-L42R,ePTEN         | L42R,ePTEN-GFP amplified using primers PTEN-TOPO-f and GFP-TOPO-r inserted into pcDNA3.1                                        | This study                  |
| pcDNA3.1-L42R,ePTEN,A4      | L42R,ePTEN,A4-GFP amplified using primers PTEN-TOPO-f and GFP-TOPO-r inserted into pcDNA3.1                                     | This study                  |
| pcDNA3.1-K13R               | PTEN-GFP mutated using primers PTEN-TOPO-f, GFP-TOPO-r and PTEN-K13R-f inserted into pcDNA3.1                                   | This study                  |
| pcDNA3.1-K13R,L42R,ePTEN    | L42R,ePTEN-GFP mutated using primers PTEN-TOPO-f, GFP-TOPO-r and PTEN-K13R-f inserted into pcDNA3.1                             | This study                  |
| pcDNA3.1-K13R,nPTEN         | nPTEN-GFP mutated using primers PTEN-TOPO-f, GFP-TOPO-r and PTEN-K13R-f inserted into pcDNA3.1                                  | This study                  |
| pcDNA3.1-K13R,A4            | A4-GFP mutated using primers PTEN-TOPO-f, GFP-TOPO-r and                                                                        | This study                  |

|                                             |                                                                                                                                                                                                            |                                             |
|---------------------------------------------|------------------------------------------------------------------------------------------------------------------------------------------------------------------------------------------------------------|---------------------------------------------|
|                                             | PTEN-K13R-f inserted into pcDNA3.1                                                                                                                                                                         |                                             |
| pcDNA3.1-K13R,L42R,A4                       | L42R,A4-GFP mutated using PTEN-TOPO-f, GFP-TOPO-r and PTEN-K13R-f inserted into pcDNA3.1                                                                                                                   | This study                                  |
| pcDNA3.1-K13R,ePTEN                         | K13R,ePTEN-GFP amplified using primers PTEN-TOPO-f and GFP-TOPO-r and inserted into pcDNA3.1                                                                                                               | This study                                  |
| pcDNA3.1-K289E                              | K289E-GFP amplified using primers PTEN-TOPO-f and GFP-TOPO-r and inserted into pcDNA3.1                                                                                                                    | This study                                  |
| pcDNA3.1-K289E,A4                           | K289E,A4-GFP amplified using primers PTEN-TOPO-f and GFP-TOPO-r and inserted into pcDNA3.1                                                                                                                 | This study                                  |
| pcDNA3.1-K289E,ePTEN                        | K289E,ePTEN-GFP amplified using primers PTEN-TOPO-f and GFP-TOPO-r and inserted into pcDNA3.1                                                                                                              | This study                                  |
| pcDNA3.1-K289E,L42R,ePTEN                   | L42R,ePTEN-GFP mutated using primers PTEN-TOPO-f, GFP-TOPO-r and PTEN-K289E-f and PTEN-K289E-r inserted into pcDNA3.1                                                                                      | This study                                  |
| pcDNA3.1-K289E,nPTEN                        | nPTEN-GFP mutated using primers PTEN-TOPO-f, GFP-TOPO-r and PTEN-K289E-f and PTEN-K289E-r inserted into pcDNA3.1                                                                                           | This study                                  |
| pcDNA3.1-K254R,A4                           | A4-GFP mutated using primers PTEN-TOPO-f, GFP-TOPO-r, PTEN-K254R-f and PTEN-K254R-r, inserted into pcDNA3.1                                                                                                | This study                                  |
| pcDNA3.1-K254R                              | <i>NheI/NotI</i> fragment from pcDNA3.1-PTEN inserted into <i>NheI/NotI</i> pcDNA3.1-K254R,A4                                                                                                              | This study                                  |
| pcDNA3.1-PTEN (no tag)                      | PTEN amplified using primers PTEN-TOPO-f and PTEN-NotI-r, inserted into pcDNA3.1                                                                                                                           | This study                                  |
| pcDNA3.1-ePTEN (no tag)                     | ePTEN amplified using primers PTEN-TOPO-f and PTEN-NotI-r, inserted into pcDNA3.1                                                                                                                          | This study                                  |
| pcDNA3.1-nPTEN (no tag)                     | nPTEN amplified using primers PTEN-TOPO-f and PTEN-NotI-r, inserted into pcDNA3.1                                                                                                                          | This study                                  |
| pcDNA-ePTEN, $\Delta$ PDZ-BM                | ePTEN, $\Delta$ PDZ-BM-GFP amplified using primers PTEN-TOPO-f and GFP-TOPO-r inserted into pcDNA3.1                                                                                                       | This study                                  |
| pcDNA3.1-hPTEN <sub>352-403</sub> -YFP-FLAG |                                                                                                                                                                                                            | Rahdar <i>et al.</i> (2009)                 |
| pmCherry-PH <sub>AKT</sub>                  |                                                                                                                                                                                                            | Gift from T. Inoue*                         |
| pLKO.1-shRNA1 NEDD4-1                       |                                                                                                                                                                                                            | HiT center, JHU<br>TRCN0000007553           |
| pLKO.1-shRNA2 NEDD4-1                       |                                                                                                                                                                                                            | HiT center, JHU<br>TRCN0000007554           |
| pRK5-HA-Ubiquitin                           |                                                                                                                                                                                                            | Addgene, 17608                              |
| pCI-HA-NEDD4                                |                                                                                                                                                                                                            | Addgene, 27002                              |
| pCI-neo-mCherry-NEDD4                       |                                                                                                                                                                                                            | Addgene, 38316                              |
| pCI-neo-FLAG-HAUSP                          |                                                                                                                                                                                                            | Addgene, 16655                              |
| NES-CFP-FRB                                 | NES-CR was made by inserting an annealed product, NES derived from MAPKK, into CR vector using <i>NheI</i> and <i>AgeI</i> . The sequence of annealing primers are attached (NES(MAPKK)CFP-FRB (ECFP-C1)). |                                             |
| FRB-CFP-Emerin                              | FRB-CFP-Emerin was made by replacing GFP of GFP-Emerin (gift from Katherine Wilson) with FRB-CFP (reported in Nat Meth 2005) using <i>NheI</i> and <i>BsrGI</i> .                                          |                                             |
| NLS-CFP-FRB                                 | NLSx3-CR was made by inserting an annealed product, NLSx3, into CR vector using <i>NheI</i> and <i>AgeI</i> . The sequence of annealing primers are attached (081411).                                     |                                             |
| YFP-FKBP                                    |                                                                                                                                                                                                            | Inoue <i>et al.</i> (2005)<br>PMID 15908919 |
| YFP-FKBP- $\beta$ Gal $\Delta$ N            |                                                                                                                                                                                                            | Lin <i>et al.</i> (2013)<br>PMID 23666116   |

|                      |                                                                                                         |            |
|----------------------|---------------------------------------------------------------------------------------------------------|------------|
| PTEN-YFP-FKBP        | PTEN amplified using primers PTEN-N1F and PTEN-N1R and inserted into <i>EcoRI/BamHI</i> YFP-FKBP        | This study |
| nPTEN-YFP-FKBP       | nPTEN amplified using primers PTEN-N1F and PTEN-N1R and inserted into <i>EcoRI/BamHI</i> YFP-FKBP       | This study |
| ePTEN-YFP-FKBP       | ePTEN amplified using primers PTEN-N1F and PTEN-N1R and inserted into <i>EcoRI/BamHI</i> YFP-FKBP       | This study |
| PTENK13R-YFP-FKBP    | PTENK13R amplified using primers PTEN-N1F and PTEN-N1R and inserted into <i>EcoRI/BamHI</i> YFP-FKBP    | This study |
| PTENK13R,A4-YFP-FKBP | PTENK13R,A4 amplified using primers PTEN-N1F and PTEN-N1R and inserted into <i>EcoRI/BamHI</i> YFP-FKBP | This study |
| peGFP-C1-PTEN        | PTEN amplified using PTEN-XhoI2-f and PTEN-BamHI2-r, inserted into <i>XhoI/BamHI</i> peGFP-C1           | This study |
| peGFP-C1-ePTEN       | ePTEN amplified using PTEN-XhoI2-f and PTEN-BamHI2-r, inserted into <i>XhoI/BamHI</i> peGFP-C1          | This study |
| peGFP-C1-nPTEN       | nPTEN amplified using PTEN-XhoI2-f and PTEN-BamHI2-r, inserted into <i>XhoI/BamHI</i> peGFP-C1          | This study |
| pmCherry-N1-PTEN     | PTEN amplified using PTEN-XhoI-f and PTEN-BamHI-r, inserted into <i>XhoI/BamHI</i> pmCherry-N1          | This study |



**Table S2. Primers used in this study**

|                           |                                                     |
|---------------------------|-----------------------------------------------------|
| HuPTEN5BamHI2             | CTGGGATCCAAATAAAAATGACAGCCATC                       |
| HuPTEN3XhoI2              | CTCCTCGAGCCGACTTTTGTAATTTG                          |
| ePTEN-L42R-f              | GATTTCTGCAGAAGGAAGAGAAGGCGTATACAG                   |
| ePTEN-L42R-r              | CTGTATACGCCTTCTCTTCCTTCTGCAGGAAATC                  |
| PTEN-K13R-f               | ATGACAGCCATCATCAAAGAGATCGTTAGCAGAAACAGAA<br>GGAGATA |
| PTEN-K289E-f              | GAGGAAACCTCAGAAGAAGTAGAAAATG                        |
| PTEN-K289E-r              | CATTTTCTACTTCTTCTGAGGTTTCCTC                        |
| PTEN- $\Delta$ PDZ-XhoI-r | CTCCTCGAGCCAATTTGTGTATGCTGATCTTC                    |
| PTEN-TOPO-f               | CACCATGA CAGCCATCAT CAAAG                           |
| GFP-TOPO-r                | TTACTTGTACAGCTCGTCCATG                              |
| PTEN-N1F                  | AACGAATTCGCCACCATGACAGCC                            |
| PTEN-N1R                  | TAAGGATCCGACTTTTGTAATTTGTGTATGCTG                   |
| PTEN-K254R-f              | TGTGTGGTGATATCAGAGTAGAGTTCTTCCAC                    |
| PTEN-K254R-r              | GTGGAAGAACTCTACTCTGATATCACCACACA                    |
| PTEN-NotI-r               | CTGCGGCCGCTTAGACTTTTGTAATTTGTG                      |
| PTEN-XhoI-f               | CAACTCGAGATGACAGCCATCATCAAAGAGATCGT                 |
| PTEN-BamHI-r              | CAAGGATCCCCGACTTTTGTAATTTGTGTATGCTGATCTTC           |
| PTEN-XhoI2-f              | CAACTCGAGCTACAGCCATCATCAAAG                         |
| PTEN-BamHI2-r             | CCAGGATCCTTAGACTTTTGTAATTTGTGTATGC                  |
